# Supplementary material for: Iridium(i) hydroxides in catalysis: rearrangement of allylic alcohols to ketones
Source: Royal Society of Chemistry journal article supplement (doi:10.1039/c4ob01428f), 2014-01-01
Supplement: c4ob01428f1.pdf [file c4ob01428f1.pdf]

Supplementary Materials for

**Iridium(I) hydroxides in catalysis: rearrangement of allylic alcohols to ketones**

David J. Nelson,<sup>a,b</sup> José A. Fernández-Salas,<sup>a</sup> Byron J. Truscott<sup>a</sup> and Steven P. Nolan<sup>a\*</sup>

Correspondence to: [snolan@st-andrews.ac.uk](mailto:snolan@st-andrews.ac.uk)

This file includes:

|                                                               |               |
|---------------------------------------------------------------|---------------|
| <b>Experimental procedures and characterisation data.....</b> | <b>S2-S3</b>  |
| <b>Figures S1 to S15.....</b>                                 | <b>S4-S12</b> |

## Experimental Details and Characterisation Data

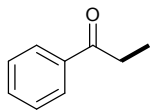

Propiophenone. The general procedure was followed for alcohol isomerisation using microwave irradiation to convert 1-phenyl-2-propen-1-ol (134 mg, 1 mmol) to propiophenone (121 mg, 90%). The  $^1\text{H}$  NMR spectrum matched the reported data.<sup>1</sup>

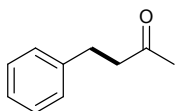

4-Phenylbutan-2-one. The general procedure was followed for alcohol isomerisation using microwave irradiation to convert 1-methyl-3-phenyl-2-propen-1-ol (148.2 mg, 1 mmol) to 4-phenylbutan-2-one (129 mg, 87%). The  $^1\text{H}$  NMR spectrum matched the reported data.<sup>1</sup>

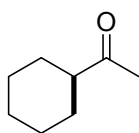

1-Cyclohexylethan-1-one. The general procedure was followed for alcohol isomerisation using microwave irradiation to convert 1-(cyclohex-1-en-1-yl)ethan-1-ol (126 mg, 1 mmol) to 1-cyclohexylethan-1-one (102 mg, 81%) in 2 h. The  $^1\text{H}$  NMR spectrum matched the reported data.<sup>2</sup>

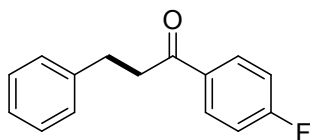

1-(4-Fluorophenyl)-3-phenylpropan-1-one. The general procedure was followed for alcohol isomerisation using microwave irradiation to convert (*E*)-1-(4-fluorophenyl)-3-phenylprop-2-en-1-ol (228 mg, 1 mmol) to 1-(4-fluorophenyl)-3-phenylpropan-1-one (192 mg, 86%). The  $^1\text{H}$  NMR spectrum matched the reported data.<sup>1</sup>

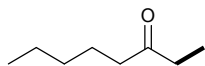

Octan-3-one. The general procedure was followed for alcohol isomerisation using microwave irradiation to convert oct-1-en-3-ol (128 mg, 1 mmol) to octan-3-one (105 mg, 82%). The  $^1\text{H}$  NMR spectrum matched the reported data.<sup>1</sup>

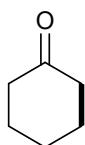

Cyclohexanone. The general procedure was followed for alcohol isomerisation using microwave irradiation to convert cyclohex-2-en-1-ol (98 mg, 1 mmol) to cyclohexanone (80 mg, 82%) in 1.5 h using 0.25 mol% of  $[\text{Ir}(\text{COD})(\text{I}^t\text{Pr})(\text{OH})]$ . The  $^1\text{H}$  NMR spectrum matched the reported data.<sup>1</sup>

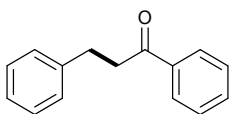

1,3-Diphenylpropan-1-one. The general procedure was followed for alcohol isomerisation using microwave irradiation to convert (*E*)-1,3-diphenylprop-2-en-1-ol (210 mg, 1 mmol) to 1,3-diphenylpropan-1-one (191 mg, 91%). The  $^1\text{H}$  NMR spectrum matched the reported data.<sup>1</sup>

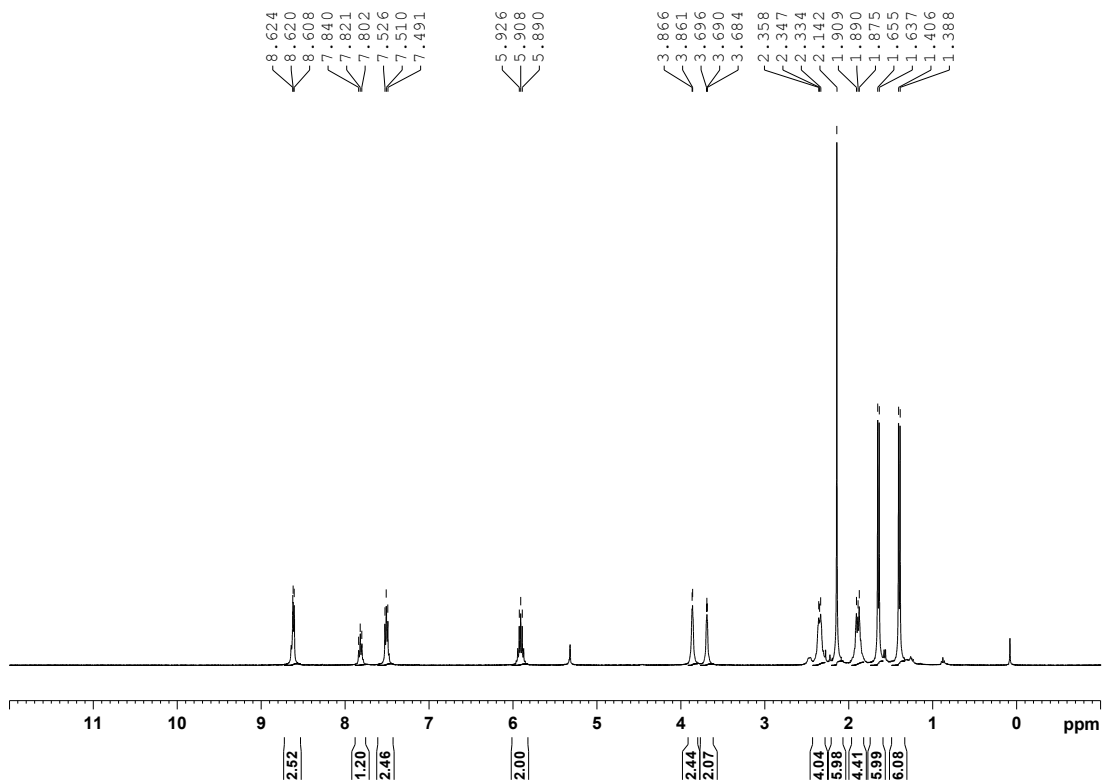

**Figure S 1**  $^1\text{H}$  NMR (400 MHz,  $\text{CD}_2\text{Cl}_2$ ) spectrum for  $[\text{Ir}(\text{COD})(\text{I}^i\text{PrMe})(\text{py})][\text{PF}_6]$

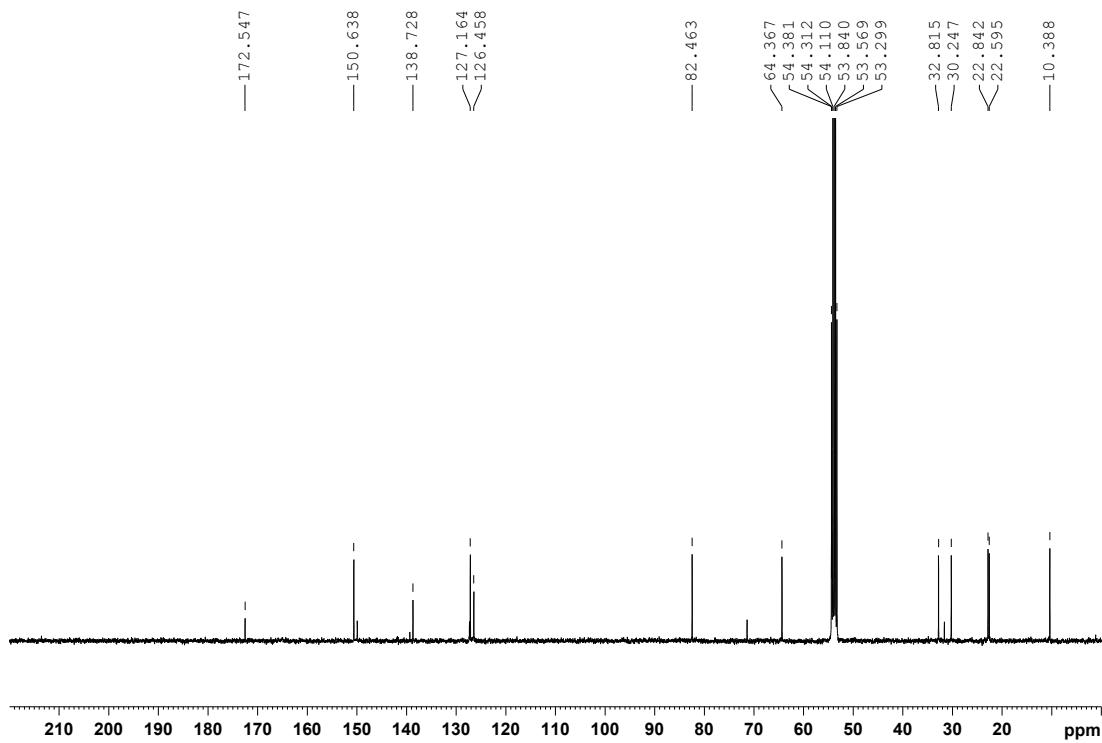

**Figure S 2**  $^{13}\text{C}\{^1\text{H}\}$  NMR (100 MHz,  $\text{CD}_2\text{Cl}_2$ ) spectrum for  $[\text{Ir}(\text{COD})(\text{I}^i\text{PrMe})(\text{py})][\text{PF}_6]$

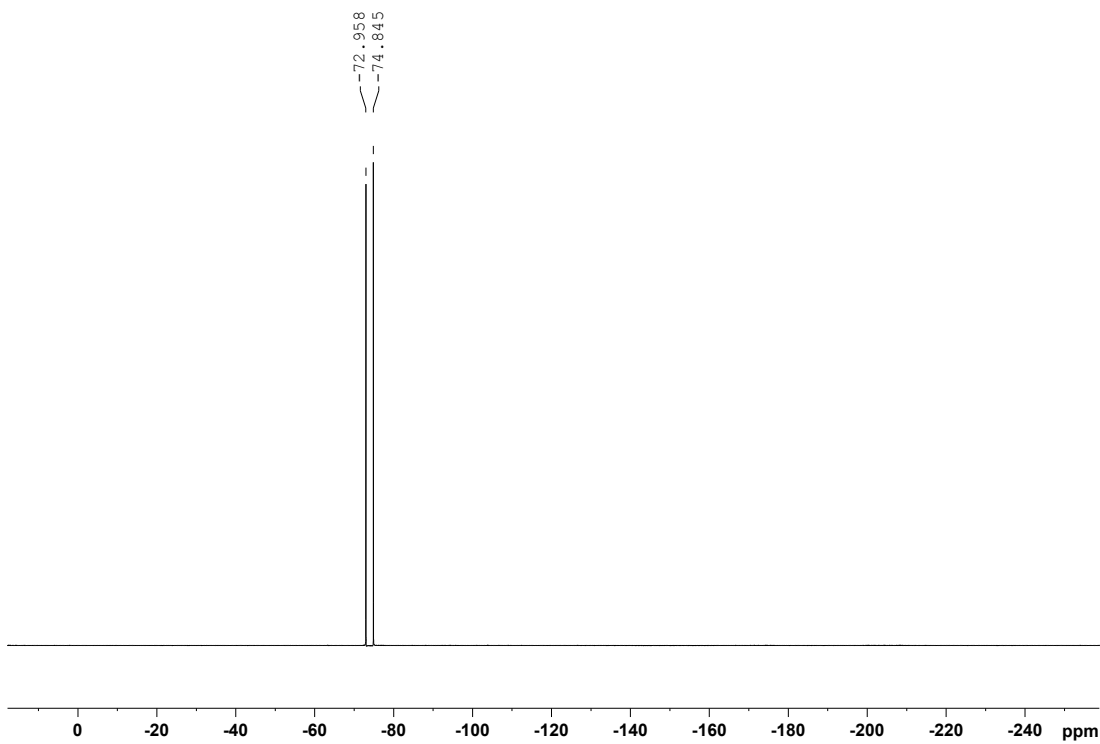

**Figure S 3**  $^{19}\text{F}\{^1\text{H}\}$  NMR (376 MHz,  $\text{CD}_2\text{Cl}_2$ ) spectrum for  $\text{Ir}(\text{COD})(\text{I}^i\text{PrMe})(\text{py})[\text{PF}_6]$

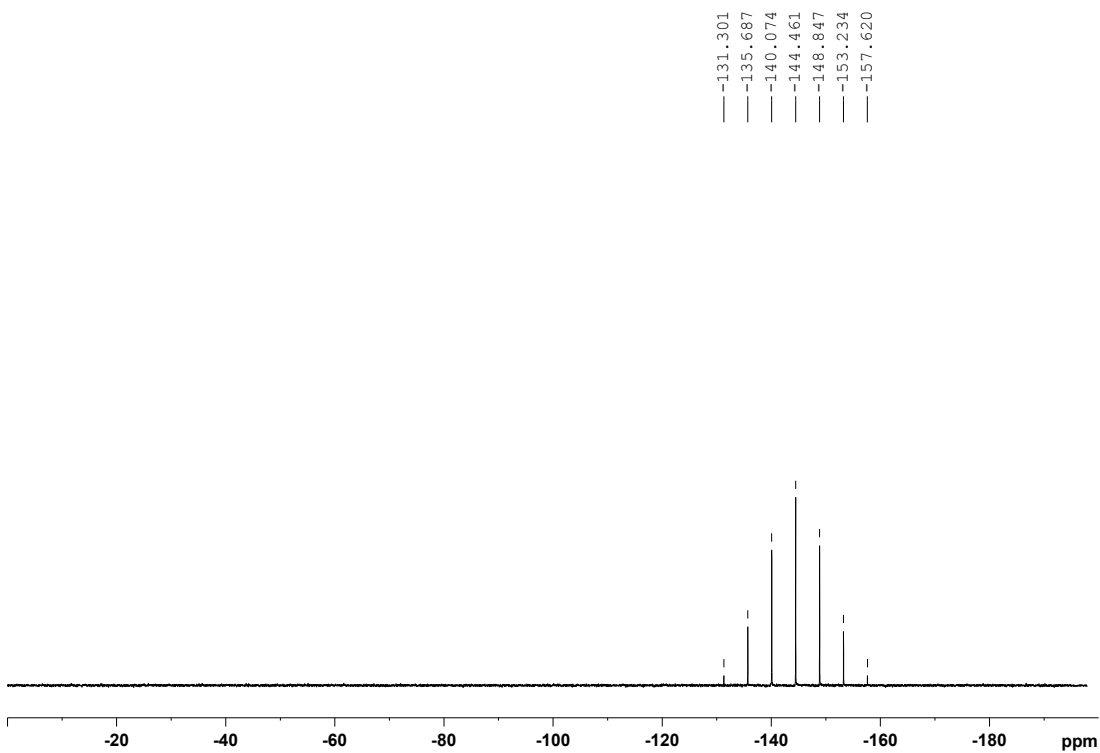

**Figure S 4**  $^{31}\text{P}\{^1\text{H}\}$  NMR (162 MHz,  $\text{CD}_2\text{Cl}_2$ ) spectrum for  $\text{Ir}(\text{COD})(\text{I}^i\text{PrMe})(\text{py})[\text{PF}_6]$

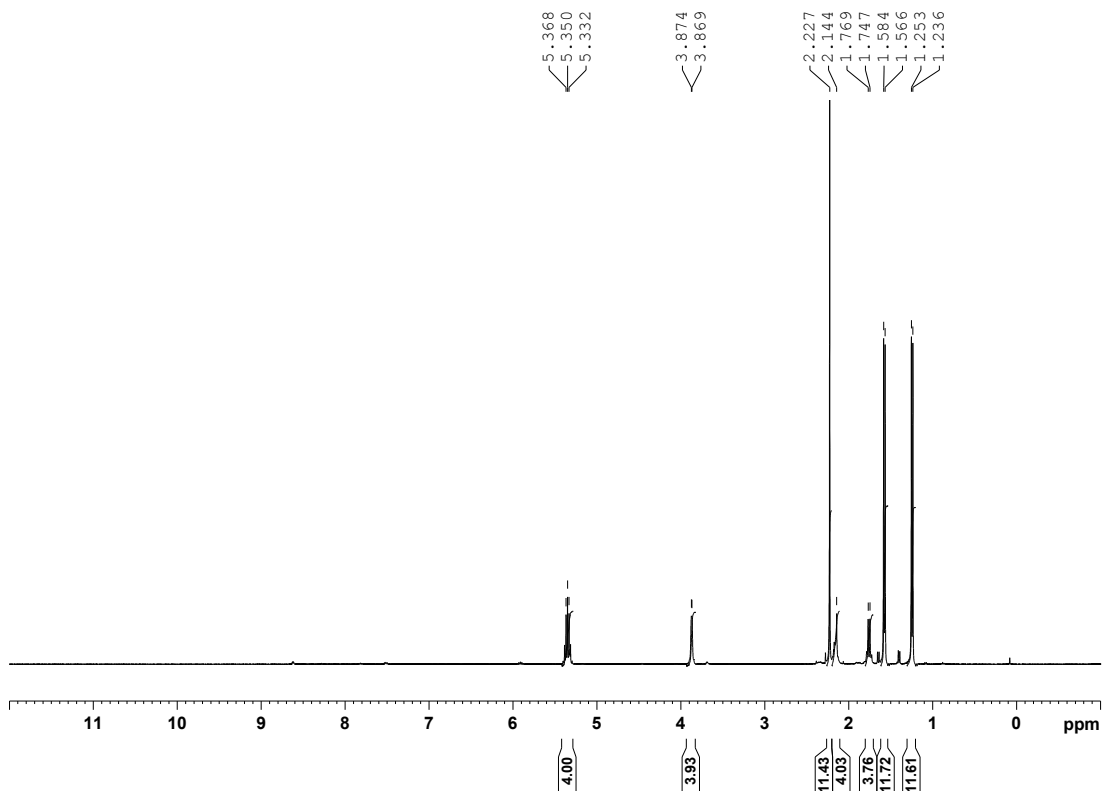

**Figure S 5**  $^1\text{H}$  NMR (300 MHz,  $\text{CD}_2\text{Cl}_2$ ) spectrum for  $[(\text{I}^i\text{PrMe})_2\text{Ir}(\text{COD})][\text{PF}_6]$

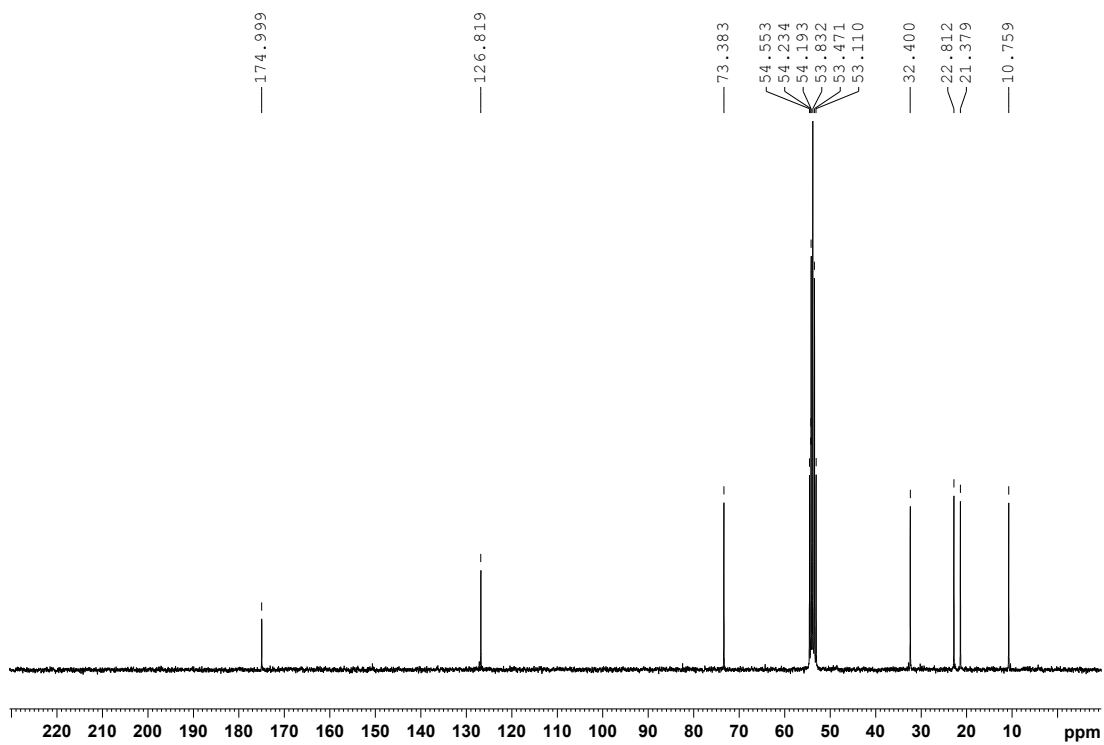

**Figure S 6**  $^{13}\text{C}\{^1\text{H}\}$  NMR (75 MHz,  $\text{CD}_2\text{Cl}_2$ ) spectrum for  $[\text{Ir}(\text{COD})(\text{I}^i\text{PrMe})_2][\text{PF}_6]$

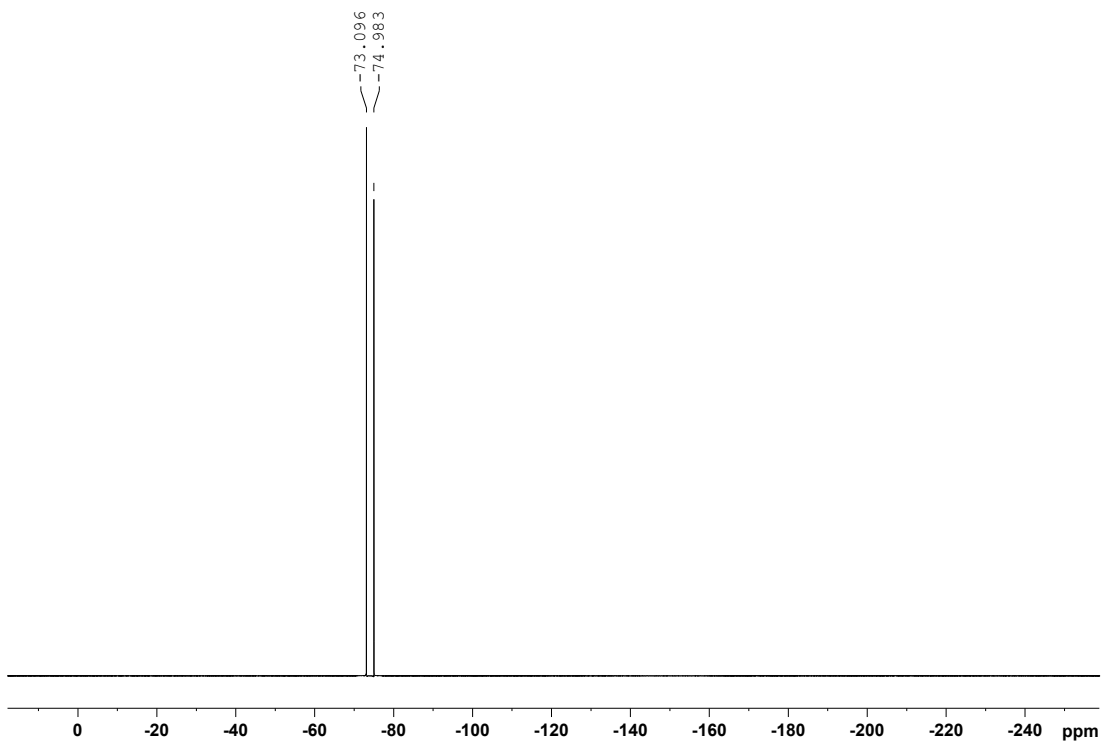

Figure S 7  $^{19}\text{F}\{^1\text{H}\}$  NMR (376 MHz,  $\text{CD}_2\text{Cl}_2$ ) spectrum for  $[\text{Ir}(\text{COD})(i\text{PrMe})_2][\text{PF}_6]$

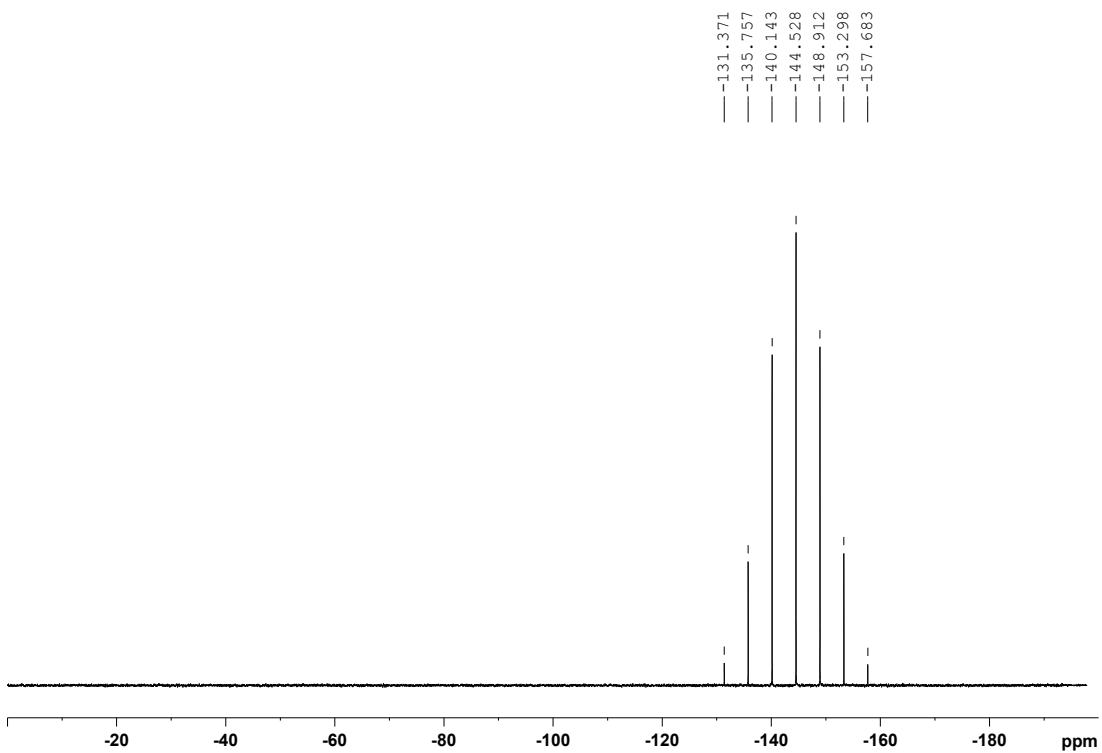

Figure S 8  $^{31}\text{P}\{^1\text{H}\}$  NMR (162 MHz,  $\text{CD}_2\text{Cl}_2$ ) spectrum for  $[\text{Ir}(\text{COD})(i\text{PrMe})_2][\text{PF}_6]$

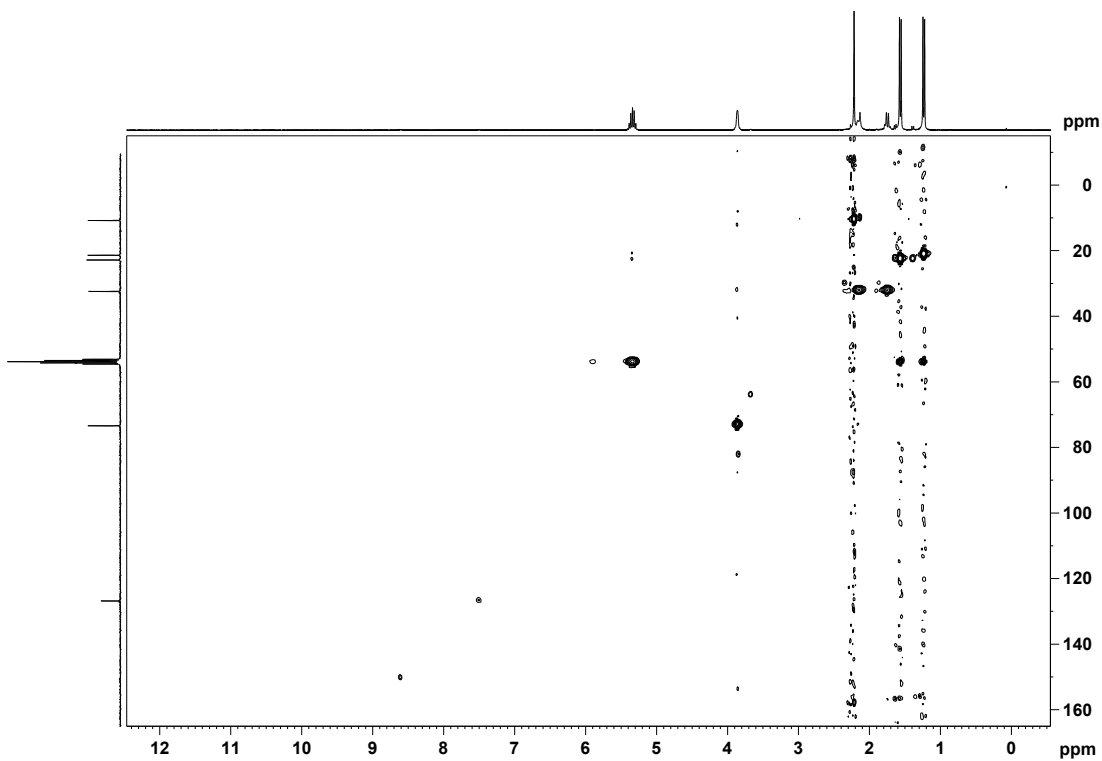

Figure S 9 HSQC NMR (300 MHz,  $\text{CD}_2\text{Cl}_2$ ) spectrum for  $[\text{Ir}(\text{COD})(\text{I}^i\text{PrMe})_2][\text{PF}_6]$

$7.979$   
 $7.976$   
 $7.963$   
 $7.958$   
 $7.955$   
 $7.573$   
 $7.570$   
 $7.566$   
 $7.557$   
 $7.551$   
 $7.546$   
 $7.536$   
 $7.533$   
 $7.530$   
 $7.476$   
 $7.472$   
 $7.459$   
 $7.456$   
 $7.438$   
 $7.436$   
 $7.258$

$3.036$   
 $3.018$   
 $3.000$   
 $2.982$

$1.246$   
 $1.228$   
 $1.210$

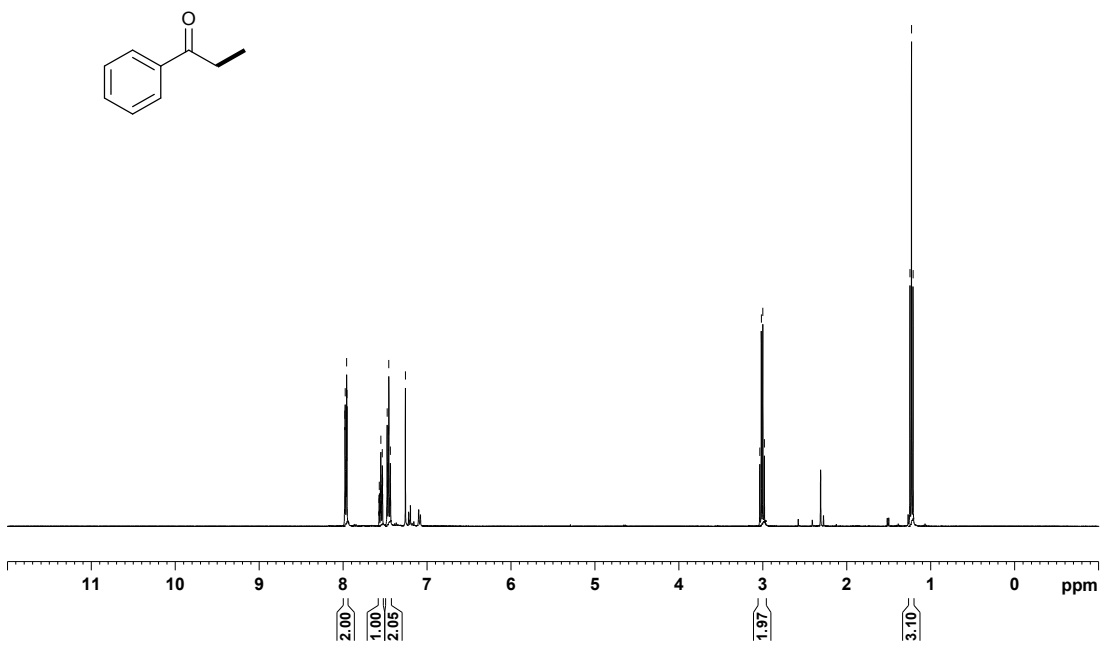

Figure S 10  $^1\text{H}$  NMR (500 MHz,  $\text{CDCl}_3$ ) spectrum for propiophenone



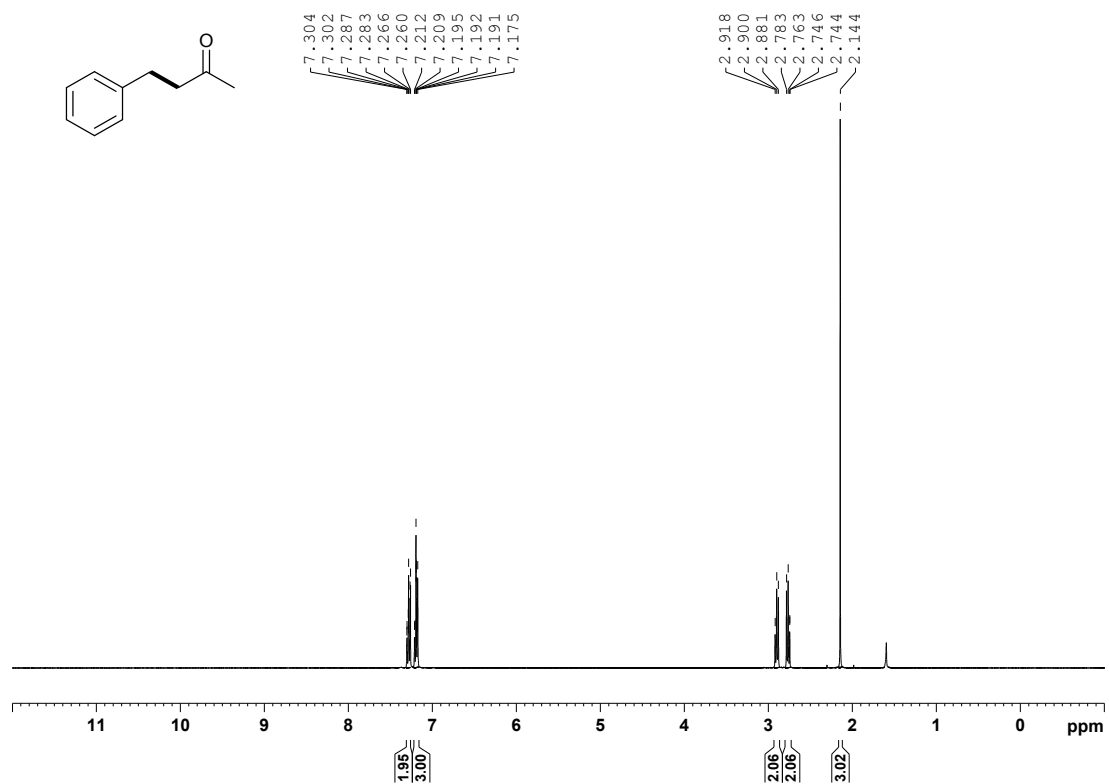

**Figure S 11** <sup>1</sup>H NMR (400 MHz, CDCl<sub>3</sub>) spectrum for 4-phenylbutan-2-one

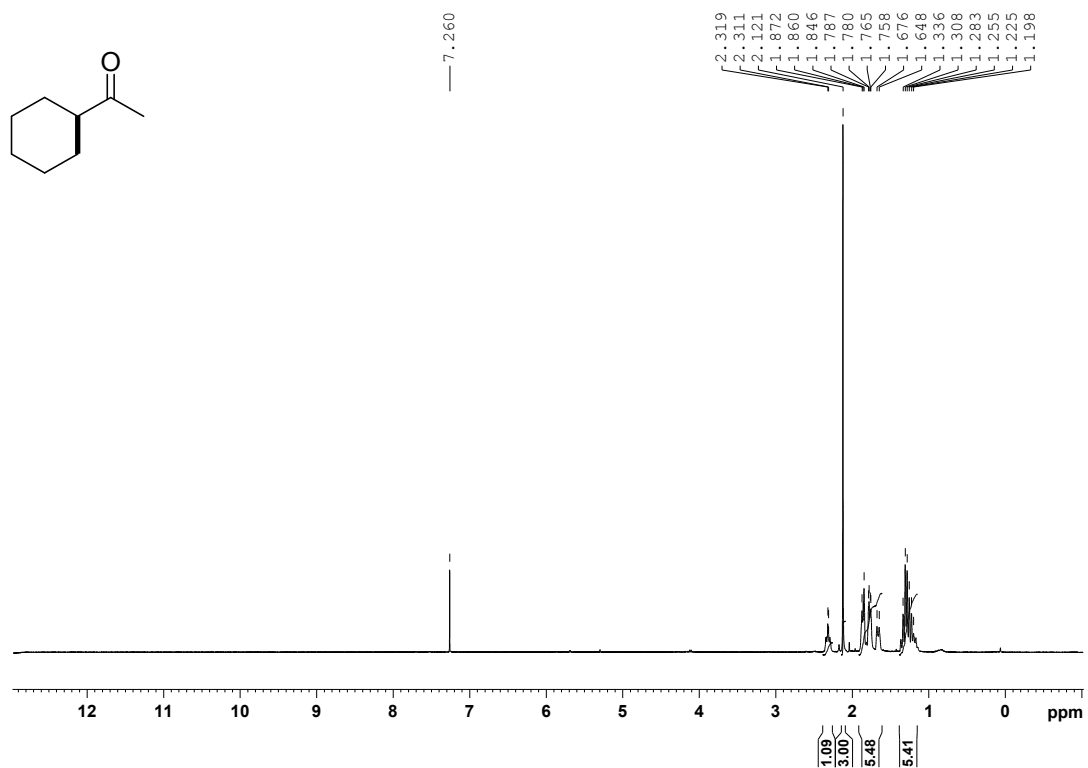

**Figure S 12** <sup>1</sup>H NMR (500 MHz, CDCl<sub>3</sub>) spectrum for 1-cyclohexylethan-1-one

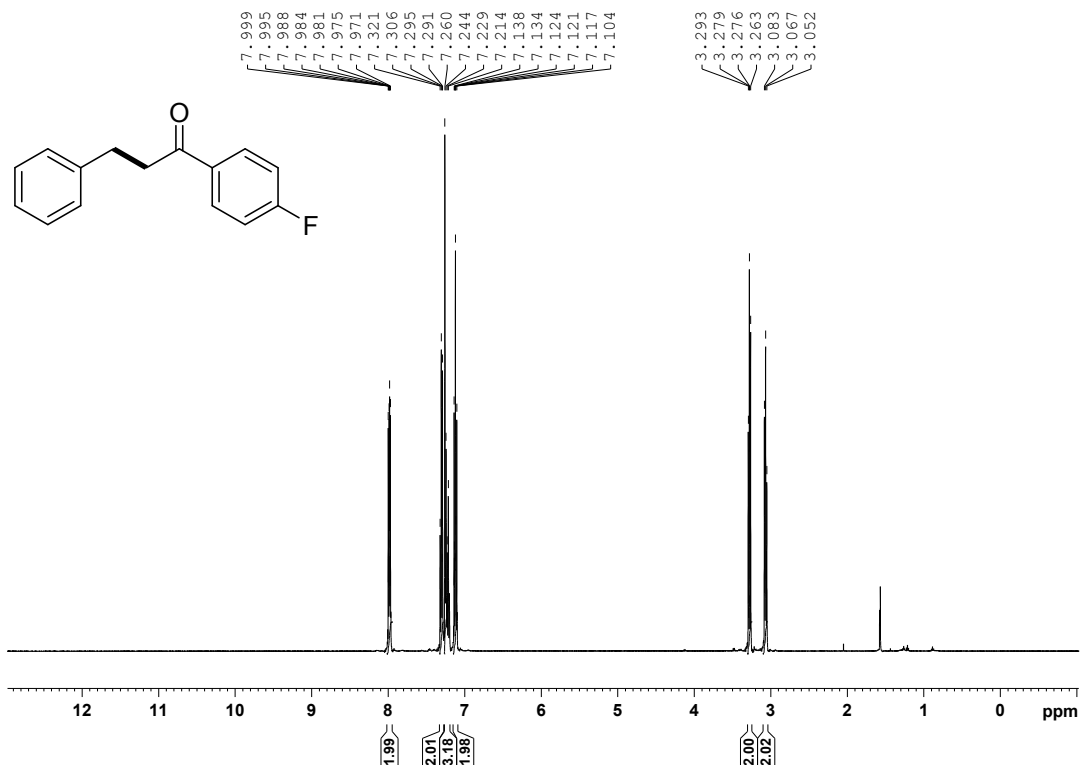

**Figure S 13** <sup>1</sup>H NMR (500 MHz, CDCl<sub>3</sub>) spectrum for 1-(4-fluorophenyl)-3-phenylpropan-1-one

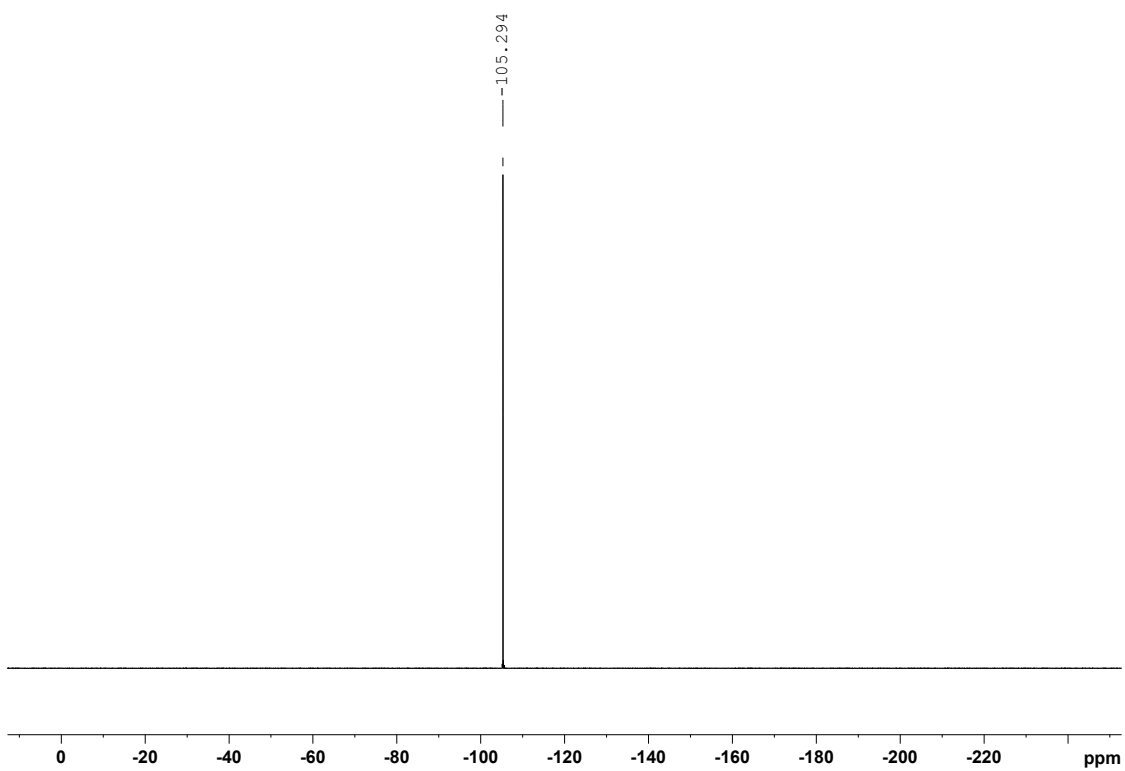

**Figure S 14** <sup>19</sup>F {<sup>1</sup>H} NMR (470 MHz, CDCl<sub>3</sub>) spectrum for 1-(4-fluorophenyl)-3-phenylpropan-1-one

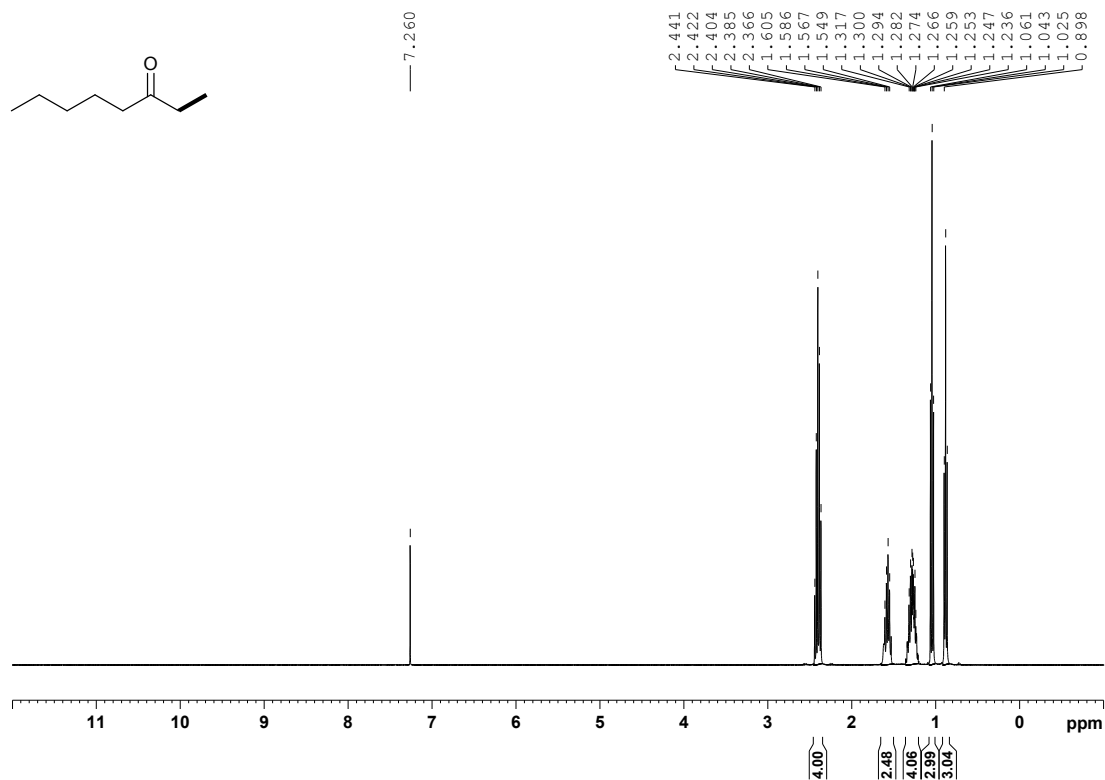

Figure S 15  $^1\text{H}$  NMR (400 MHz,  $\text{CDCl}_3$ ) spectrum for octan-3-one

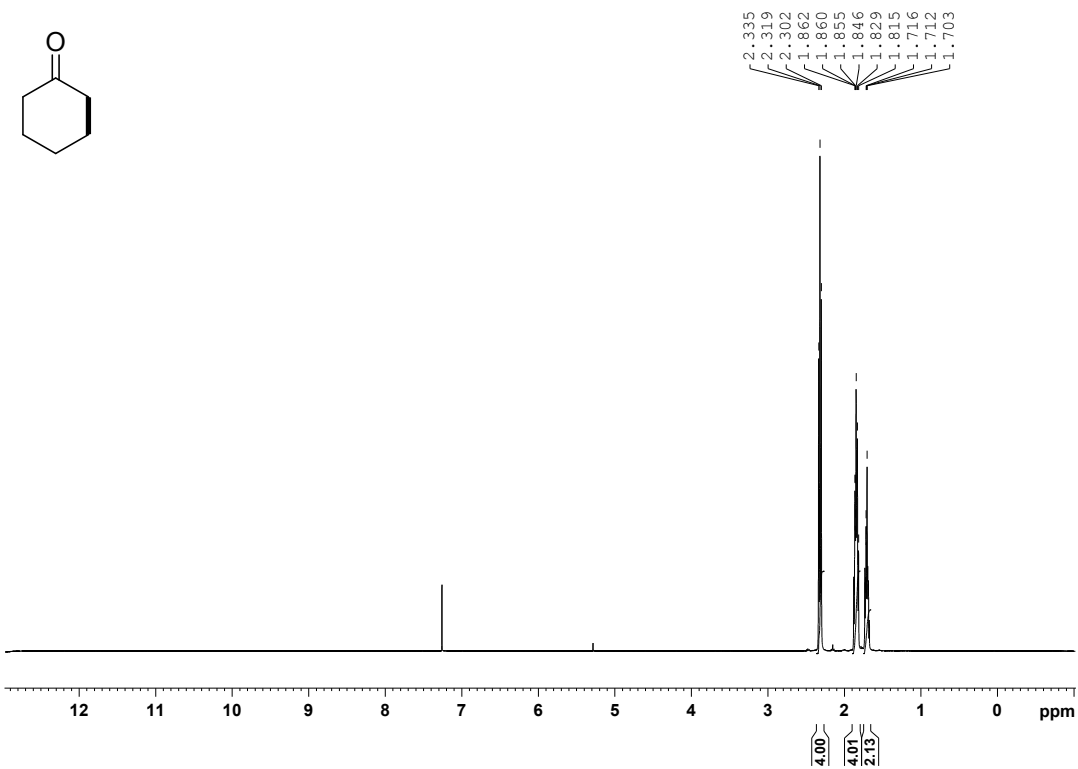

Figure S 16  $^1\text{H}$  NMR (500 MHz,  $\text{CDCl}_3$ ) spectrum for cyclohexanone

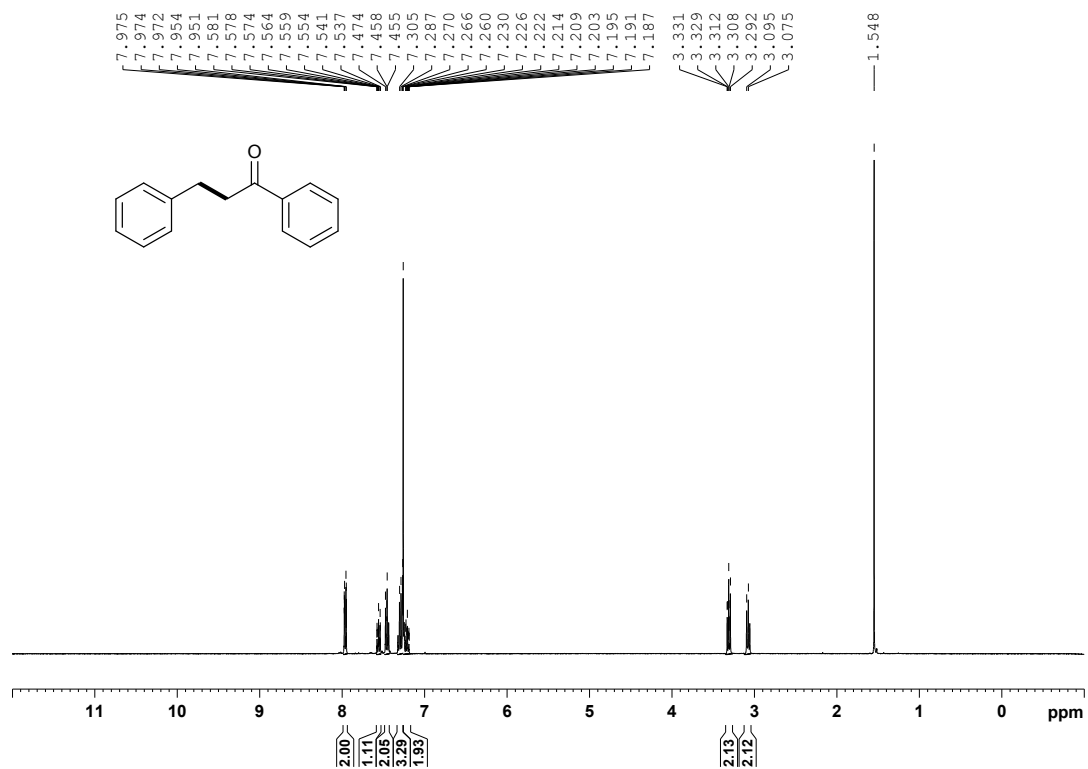

**Figure S 17** <sup>1</sup>H NMR (500 MHz, CDCl<sub>3</sub>) spectrum for 1,3-diphenylpropan-1-one

1. S. Manzini, A. Poater, D. J. Nelson, L. Cavallo and S. P. Nolan, *Chem. Sci.*, 2014, **5**, 180-188.
2. Y.-F. Wang, Y.-R. Gao, S. Mao, Y.-L. Zhang, D.-D. Guo, Z.-L. Yan, S.-H. Guo and Y.-Q. Wang, *Org. Lett.*, 2014, **16**, 1610-1613.
